# Supplementary material for: The straight and narrow: a game theory model of broad- and narrow-spectrum empiric antibiotic therapy
Source: bioRxiv or medRxiv preprint supplement (doi:10.1101/2023.02.15.23285947), 2023-02-16
Supplement: Supplementary file [file media-1.pdf]

## Supplementary Material

### The straight and narrow: a game theory model of broad- and narrow-spectrum empiric antibiotic therapy

Formulations and proofs of all the theorems, Lemmas and claims.

#### SM.1

**Lemma 1.**  $d_i^{t,k} = \tilde{B}\tilde{N}, \forall i \in \{1, \dots, n\}$  is a symmetric stage-equilibrium if

$$\begin{aligned} & \left( e_B^{t,k} - e_N^{t,k} \right) p_L \\ & \leq \sum_{m=0}^{n-1} \binom{n-1}{m} q_H^m (1 - q_H)^{n-1-m} \left[ v_i^{t+1,k+m} \left( s^{t+1}, \left( d_i^{t,k+m}, d_i^{t,k+m} \right) \right) \right. \\ & \quad \left. - v_i^{t+1,k+m+1} \left( s^{t+1}, \left( d_i^{t,k+m+1}, d_i^{t,k+m+1} \right) \right) \right] \\ & \leq \left( e_B^{t,k} - e_N^{t,k} \right) p_H \end{aligned}$$

*Proof.* By the ‘‘One-Stage Deviation Principle’’ [39], it is sufficient to verify that player  $i$  cannot gain by deviating from  $s$  in a single E-state.

(i) In E-state  $t, k$  player  $i$  has no incentive to deviate to  $d_i^{t,k} = \tilde{N}$  if

$$v_i^{t,k} \left( s^{t+1}, \left( \tilde{B}\tilde{N}, \tilde{B}\tilde{N} \right) \right) - v_i^{t,k} \left( s^{t+1}, \left( \tilde{N}, \tilde{B}\tilde{N} \right) \right) \geq 0 \quad (\text{A.1})$$

$$\begin{aligned} & v_i^{t,k} \left( s^{t+1}, \left( \tilde{B}\tilde{N}, \tilde{B}\tilde{N} \right) \right) - v_i^{t,k} \left( s^{t+1}, \left( \tilde{N}, \tilde{B}\tilde{N} \right) \right) \\ & = \left( \left[ e_B^{t,k} q_H p_H + e_N^{t,k} (1 - q_H) p_L \right] \right. \\ & \quad \left. + \sum_{m=0}^n \binom{n}{m} q_H^m (1 - q_H)^{n-m} v_i^{t+1,k+m} \left( s^{t+1}, \left( d_i^{t,k+m}, d_i^{t,k+m} \right) \right) \right) \\ & \quad - \left( e_N^{t,k} [q_H p_H + (1 - q_H) p_L] \right. \\ & \quad \left. + \sum_{m=0}^{n-1} \binom{n-1}{m} q_H^m (1 - q_H)^{n-1-m} v_i^{t+1,k+m} \left( s^{t+1}, \left( d_i^{t,k+m}, d_i^{t,k+m} \right) \right) \right) \\ & = \left( e_B^{t,k} - e_N^{t,k} \right) q_H p_H \\ & \quad + \sum_{m=0}^n q_H^m (1 - q_H)^{n-1-m} \left[ \binom{n}{m} (1 - q_H) - \binom{n-1}{m} \right] v_i^{t+1,k+m} \left( s^{t+1}, \left( d_i^{t,k+m}, d_i^{t,k+m} \right) \right) \\ & = \left( e_B^{t,k} - e_N^{t,k} \right) q_H p_H \\ & \quad + \sum_{m=0}^n q_H \cdot q_H^{m-1} (1 - q_H)^{n-1-m} \left[ \left( \binom{n}{m} - \binom{n-1}{m} \right) - \binom{n}{m} q_H \right] \\ & \quad \cdot v_i^{t+1,k+m} \left( s^{t+1}, \left( d_i^{t,k+m}, d_i^{t,k+m} \right) \right) \end{aligned}$$

Since  $\binom{n}{m} = \binom{n-1}{m} + \binom{n-1}{m-1}$  we get

$$\begin{aligned}
& \left( e_B^{t,k} - e_N^{t,k} \right) q_H p_H \\
& - q_H \sum_{m=0}^n q_H^{m-1} (1 - q_H)^{n-1-m} \left[ \binom{n}{m} q_H - \binom{n-1}{m-1} \right] v_i^{t+1,k+m} \left( s^{t+1}, \left( d_i^{t,k+m}, d_i^{t,k+m} \right) \right) \\
& = \left( e_B^{t,k} - e_N^{t,k} \right) q_H p_H \\
& - q_H \sum_{m=0}^n \left[ \binom{n}{m} q_H^m (1 - q_H)^{n-1-m} - \binom{n-1}{m-1} q_H^{m-1} (1 - q_H)^{n-1-m} \right] \\
& \cdot v_i^{t+1,k+m} \left( s^{t+1}, \left( d_i^{t,k+m}, d_i^{t,k+m} \right) \right) \\
& = \left( e_B^{t,k} - e_N^{t,k} \right) q_H p_H \\
& - q_H \sum_{m=0}^n \left[ \left( \binom{n-1}{m} + \binom{n-1}{m-1} \right) q_H^m (1 - q_H)^{n-1-m} - \binom{n-1}{m-1} q_H^{m-1} (1 - q_H)^{n-1-m} \right] \\
& \cdot v_i^{t+1,k+m} \left( s^{t+1}, \left( d_i^{t,k+m}, d_i^{t,k+m} \right) \right) \\
& = \left( e_B^{t,k} - e_N^{t,k} \right) q_H p_H \\
& - q_H \sum_{m=0}^n \left[ \binom{n-1}{m} q_H^m (1 - q_H)^{n-1-m} - \binom{n-1}{m-1} q_H^{m-1} (1 - q_H)^{n-1-m} (-q_H + 1) \right] \\
& \cdot v_i^{t+1,k+m} \left( s^{t+1}, \left( d_i^{t,k+m}, d_i^{t,k+m} \right) \right) \\
& = \left( e_B^{t,k} - e_N^{t,k} \right) q_H p_H \\
& - q_H \sum_{m=0}^n \left[ \binom{n-1}{m} q_H^m (1 - q_H)^{n-1-m} - \binom{n-1}{m-1} q_H^{m-1} (1 - q_H)^{n-m} \right] \\
& \cdot v_i^{t+1,k+m} \left( s^{t+1}, \left( d_i^{t,k+m}, d_i^{t,k+m} \right) \right) \\
& = \left( e_B^{t,k} - e_N^{t,k} \right) q_H p_H \\
& - q_H \sum_{m=0}^{n-1} \binom{n-1}{m} q_H^m (1 - q_H)^{n-1-m} \left[ v_i^{t+1,k+m} \left( s^{t+1}, \left( d_i^{t,k+m}, d_i^{t,k+m} \right) \right) \right. \\
& \left. - v_i^{t+1,k+m+1} \left( s^{t+1}, \left( d_i^{t,k+m+1}, d_i^{t,k+m+1} \right) \right) \right] \\
& \geq 0
\end{aligned} \tag{A.2}$$

which yields

$$\begin{aligned}
& \left( e_B^{t,k} - e_N^{t,k} \right) p_H \\
& \geq \sum_{m=0}^{n-1} \binom{n-1}{m} q_H^m (1 - q_H)^{n-1-m} \left[ v_i^{t+1,k+m} \left( s^{t+1}, \left( d_i^{t,k+m}, d_i^{t,k+m} \right) \right) \right. \\
& \left. - v_i^{t+1,k+m+1} \left( s^{t+1}, \left( d_i^{t,k+m+1}, d_i^{t,k+m+1} \right) \right) \right]
\end{aligned} \tag{A.3}$$

(ii) In E-state  $t, k$ , Player  $i$  has no incentive to deviate to  $d_i^{t,k} = \tilde{B}$  if

$$v_i^{t,k} \left( s^{t+1}, \left( \tilde{B}N, \tilde{B}N \right) \right) - v_i^{t,k} \left( s^{t+1}, \left( \tilde{B}, \tilde{B}N \right) \right) \geq 0 \quad (\text{A.4})$$

$$\begin{aligned} & v_i^{t,k} \left( s^{t+1}, \left( \tilde{B}N, \tilde{B}N \right) \right) - v_i^{t,k} \left( s^{t+1}, \left( \tilde{B}, \tilde{B}N \right) \right) \\ &= \left( \left[ e_B^{t,k} q_H p_H + e_N^{t,k} (1 - q_H) p_L \right] \right. \\ &+ \sum_{m=0}^n \binom{n}{m} q_H^m (1 - q_H)^{n-m} v_i^{t+1,k+m} \left( s^{t+1}, \left( d_i^{t,k+m}, d_i^{t,k+m} \right) \right) \\ &- \left( e_B^{t,k} [q_H p_H + (1 - q_H) p_L] \right. \\ &+ \sum_{m=0}^{n-1} \binom{n-1}{m} q_H^m (1 - q_H)^{n-1-m} v_i^{t+1,k+m+1} \left( s^{t+1}, \left( d_i^{t,k+m+1}, d_i^{t,k+m+1} \right) \right) \left. \right) \\ &= \left( e_N^{t,k} - e_B^{t,k} \right) (1 - q_H) p_L \\ &+ (1 - q_H) \sum_{m=0}^n q_H^{m-1} (1 - q_H)^{n-m-1} \left[ \binom{n}{m} q_H - \binom{n-1}{m-1} \right] v_i^{t+1,k+m} \left( s^{t+1}, \left( d_i^{t,k+m}, d_i^{t,k+m} \right) \right) \\ &= \left( e_N^{t,k} - e_B^{t,k} \right) (1 - q_H) p_L \\ &+ (1 - q_H) \sum_{m=0}^n \left[ \binom{n}{m} q_H^m (1 - q_H)^{n-1-m} - \binom{n-1}{m-1} q_H^{m-1} (1 - q_H)^{n-1-m} \right] \\ &\cdot v_i^{t+1,k+m} \left( s^{t+1}, \left( d_i^{t,k+m}, d_i^{t,k+m} \right) \right) \\ &\geq 0 \end{aligned} \quad (\text{A.5})$$

which yields

$$\begin{aligned} & \left( e_B^{t,k} - e_N^{t,k} \right) p_L \\ &\leq \sum_{m=0}^{n-1} \binom{n-1}{m} q_H^m (1 - q_H)^{n-1-m} \left[ v_i^{t+1,k+m} \left( s^{t+1}, \left( d_i^{t,k+m}, d_i^{t,k+m} \right) \right) \right. \\ &\quad \left. - v_i^{t+1,k+m+1} \left( s^{t+1}, \left( d_i^{t,k+m+1}, d_i^{t,k+m+1} \right) \right) \right] \end{aligned} \quad (\text{A.6})$$

□

## SM.2

**Lemma 2.**  $d_i^{t,k} = \tilde{B}N, \forall i \in \{1, \dots, n\}$  is a symmetric stage-optimum if the following two conditions hold:

$$\begin{aligned} & \left( e_B^{t,k} - e_N^{t,k} \right) (1 - q_H) p_L \\ & \leq \sum_{m=0}^n \binom{n}{m} q_H^m (1 - q_H)^{n-m} \left[ v_i^{t+1, k+m} \left( s^{t+1}, \left( d_i^{t, k+m}, d_i^{t, k+m} \right) \right) \right. \\ & \quad \left. - v_i^{t+1, k+n} \left( s^{t+1}, \left( d_i^{t, k+n}, d_i^{t, k+n} \right) \right) \right] \end{aligned}$$

and

$$\begin{aligned} & \left( e_B^{t,k} - e_N^{t,k} \right) q_H p_H \\ & \geq \sum_{m=0}^n \binom{n}{m} q_H^m (1 - q_H)^{n-m} \left[ v_i^{t+1, k} \left( s^{t+1}, \left( d_i^{t, k}, d_i^{t, k} \right) \right) \right. \\ & \quad \left. - v_i^{t+1, k+m} \left( s^{t+1}, \left( d_i^{t, k+m}, d_i^{t, k+m} \right) \right) \right] \end{aligned}$$

*Proof.* (i) In E-state  $t, k$  the social planner has no incentive to deviate to  $d^{t,k} = \tilde{N}$  if

$$v_i^{t,k} \left( s^{t+1}, \tilde{B}N \right) - v_i^{t,k} \left( s^{t+1}, \tilde{N} \right) \geq 0 \quad (\text{A.7})$$

By (13) this condition is equivalent to

$$v_i^{t,k} \left( s^{t+1}, \left( \tilde{B}N, \tilde{B}N \right) \right) - v_i^{t,k} \left( s^{t+1}, \left( \tilde{N}, \tilde{N} \right) \right) \geq 0 \quad (\text{A.8})$$

$$\begin{aligned} & v_i^{t,k} \left( s^{t+1}, \left( \tilde{B}N, \tilde{B}N \right) \right) - v_i^{t,k} \left( s^{t+1}, \left( \tilde{N}, \tilde{N} \right) \right) \\ & = \left( \left[ e_B^{t,k} q_H p_H + e_N^{t,k} (1 - q_H) p_L \right] \right. \\ & \quad \left. + \sum_{m=0}^n \binom{n}{m} q_H^m (1 - q_H)^{n-m} v_i^{t+1, k+m} \left( s^{t+1}, \left( d_i^{t, k+m}, d_i^{t, k+m} \right) \right) \right) \\ & \quad - \left( e_N^{t,k} [q_H p_H + (1 - q_H) p_L] \right. \\ & \quad \left. + v_i^{t+1, k} \left( s^{t+1}, \left( d_i^{t, k}, d_i^{t, k} \right) \right) \right) \\ & = \left( e_B^{t,k} - e_N^{t,k} \right) q_H p_H \\ & \quad + \sum_{m=0}^n \binom{n}{m} q_H^m (1 - q_H)^{n-m} v_i^{t+1, k+m} \left( s^{t+1}, \left( d_i^{t, k+m}, d_i^{t, k+m} \right) \right) \\ & \quad - v_i^{t+1, k} \left( s^{t+1}, \left( d_i^{t, k}, d_i^{t, k} \right) \right) \geq 0 \end{aligned}$$

which implies

$$\begin{aligned}
& \left( e_B^{t,k} - e_N^{t,k} \right) q_H p_H \\
& \geq \sum_{m=0}^n \binom{n}{m} q_H^m (1 - q_H)^{n-m} \left[ v_i^{t+1,k} \left( s^{t+1}, \left( d_i^{t,k}, d_i^{t,k} \right) \right) \right. \\
& \quad \left. - v_i^{t+1,k+m} \left( s^{t+1}, \left( d_i^{t,k+m}, d_i^{t,k+m} \right) \right) \right]
\end{aligned} \tag{A.9}$$

(ii) In E-state  $t, k$  the social planner has no incentive to deviate to  $d^{t,k} = \tilde{B}$  if

$$v^{t,k} \left( s^{t+1}, \tilde{B}N \right) - v^{t,k} \left( s^{t+1}, \tilde{B} \right) \geq 0 \tag{A.10}$$

By (13) this condition is equivalent to

$$v_i^{t,k} \left( s^{t+1}, \left( \tilde{B}N, \tilde{B}N \right) \right) - v_i^{t,k} \left( s^{t+1}, \left( \tilde{B}, \tilde{B} \right) \right) \geq 0 \tag{A.11}$$

$$\begin{aligned}
& v_i^{t,k} \left( s^{t+1}, \left( \tilde{B}N, \tilde{B}N \right) \right) - v_i^{t,k} \left( s^{t+1}, \left( \tilde{B}, \tilde{B} \right) \right) \\
& = \left( \left[ e_B^{t,k} q_H p_H + e_N^{t,k} (1 - q_H) p_L \right] \right. \\
& \quad \left. + \sum_{m=0}^n \binom{n}{m} q_H^m (1 - q_H)^{n-m} v_i^{t+1,k+m} \left( s^{t+1}, \left( d_i^{t,k+m}, d_i^{t,k+m} \right) \right) \right) \\
& \quad - \left( e_B^{t,k} [q_H p_H + (1 - q_H) p_L] \right. \\
& \quad \left. + v_i^{t+1,k+n} \left( s^{t+1}, \left( d_i^{t,k+n}, d_i^{t,k+n} \right) \right) \right) \\
& = \left( e_N^{t,k} - e_B^{t,k} \right) (1 - q_H) p_L \\
& \quad + \sum_{m=0}^n \binom{n}{m} q_H^m (1 - q_H)^{n-m} \left[ v_i^{t+1,k+m} \left( s^{t+1}, \left( d_i^{t,k+m}, d_i^{t,k+m} \right) \right) \right. \\
& \quad \left. - v_i^{t+1,k+n} \left( s^{t+1}, \left( d_i^{t,k+n}, d_i^{t,k+n} \right) \right) \right] \geq 0
\end{aligned} \tag{A.12}$$

which implies

$$\begin{aligned}
& \left( e_B^{t,k} - e_N^{t,k} \right) (1 - q_H) p_L \\
& \leq \sum_{m=0}^n \binom{n}{m} q_H^m (1 - q_H)^{n-m} \left[ v_i^{t+1,k+m} \left( s^{t+1}, \left( d_i^{t,k+m}, d_i^{t,k+m} \right) \right) \right. \\
& \quad \left. - v_i^{t+1,k+n} \left( s^{t+1}, \left( d_i^{t,k+n}, d_i^{t,k+n} \right) \right) \right]
\end{aligned} \tag{A.13}$$

□

### SM.3

**Theorem 1.** *If condition 3 holds then if the decision rule  $\tilde{B}N$  at any specific game-tree node (E-state) is part of an MPE, then it is socially optimal at this E-state as well; however, if is socially optimal at any E-state, individual player may have an incentive to deviate towards an excessive use of B.*

*Proof.* By lemma 1, in E-state  $t, k$ , when  $d_i^{t,k} = \tilde{B}N, \forall i \in \{1, \dots, n\}$ , player  $i$  has no incentive to deviate to  $d_i^{t,k} = \tilde{B}$  if

$$\begin{aligned}
& \left( e_B^{t,k} - e_N^{t,k} \right) p_L \\
& \leq \sum_{m=0}^{n-1} \binom{n-1}{m} q_H^m (1 - q_H)^{n-1-m} \left[ v_i^{t+1, k+m} \left( s^{t+1}, \left( d_i^{t, k+m}, d_i^{t, k+m} \right) \right) \right. \\
& \quad \left. - v_i^{t+1, k+m+1} \left( s^{t+1}, \left( d_i^{t, k+m+1}, d_i^{t, k+m+1} \right) \right) \right]
\end{aligned} \tag{A.14}$$

And by lemma 2, in E-state  $t, k$ , when  $d_i^{t,k} = \tilde{B}N, \forall i \in \{1, \dots, n\}$ , the social planner has no incentive to deviate to  $d^{t,k} = \tilde{B}, \forall i \in \{1, \dots, n\}$  if

$$\begin{aligned}
& \left( e_B^{t,k} - e_N^{t,k} \right) (1 - q_H) p_L \\
& \leq \sum_{m=0}^n \binom{n}{m} q_H^m (1 - q_H)^{n-m} \left[ v_i^{t+1, k+m} \left( s^{t+1}, \left( d_i^{t, k+m}, d_i^{t, k+m} \right) \right) \right. \\
& \quad \left. - v_i^{t+1, k+n} \left( s^{t+1}, \left( d_i^{t, k+n}, d_i^{t, k+n} \right) \right) \right]
\end{aligned} \tag{A.15}$$

$$\begin{aligned}
& \sum_{m=0}^n \binom{n}{m} q_H^m (1 - q_H)^{n-m} \left[ v_i^{t+1, k+m} \left( s^{t+1}, \left( d_i^{t, k+m}, d_i^{t, k+m} \right) \right) \right. \\
& \quad \left. - v_i^{t+1, k+n} \left( s^{t+1}, \left( d_i^{t, k+n}, d_i^{t, k+n} \right) \right) \right] \\
& = \sum_{m=0}^{n-1} \binom{n}{m} q_H^m (1 - q_H)^{n-m} \left[ v_i^{t+1, k+m} \left( s^{t+1}, \left( d_i^{t, k+m}, d_i^{t, k+m} \right) \right) \right. \\
& \quad \left. - v_i^{t+1, k+n} \left( s^{t+1}, \left( d_i^{t, k+n}, d_i^{t, k+n} \right) \right) \right] \\
& = (1 - q_H) \sum_{m=0}^{n-1} \binom{n}{m} q_H^m (1 - q_H)^{n-m-1} \left[ v_i^{t+1, k+m} \left( s^{t+1}, \left( d_i^{t, k+m}, d_i^{t, k+m} \right) \right) \right. \\
& \quad \left. - v_i^{t+1, k+n} \left( s^{t+1}, \left( d_i^{t, k+n}, d_i^{t, k+n} \right) \right) \right]
\end{aligned}$$

And therefore (A.15) can be presented as

$$\begin{aligned}
& \left( e_B^{t,k} - e_N^{t,k} \right) p_L \\
& \leq \sum_{m=0}^{n-1} \binom{n}{m} q_H^m (1 - q_H)^{n-m-1} \left[ v_i^{t+1, k+m} \left( s^{t+1}, \left( d_i^{t, k+m}, d_i^{t, k+m} \right) \right) \right. \\
& \quad \left. - v_i^{t+1, k+n} \left( s^{t+1}, \left( d_i^{t, k+n}, d_i^{t, k+n} \right) \right) \right]
\end{aligned} \tag{A.16}$$

Comparing (A.16) and (A.14)

$$\begin{aligned}
& \sum_{m=0}^{n-1} \binom{n}{m} q_H^m (1-q_H)^{n-1-m} \left[ v_i^{t+1, k+m} \left( s^{t+1}, \left( d_i^{t, k+m}, d_i^{t, k+m} \right) \right) \right. \\
& \quad \left. - v_i^{t+1, k+n} \left( s^{t+1}, \left( d_i^{t, k+n}, d_i^{t, k+n} \right) \right) \right] \\
& - \sum_{m=0}^{n-1} \binom{n-1}{m} q_H^m (1-q_H)^{n-1-m} \left[ v_i^{t+1, k+m} \left( s^{t+1}, \left( d_i^{t, k+m}, d_i^{t, k+m} \right) \right) \right. \\
& \quad \left. - v_i^{t+1, k+m+1} \left( s^{t+1}, \left( d_i^{t, k+m+1}, d_i^{t, k+m+1} \right) \right) \right] \\
& = \sum_{m=0}^{n-1} \binom{n-1}{m-1} q_H^m (1-q_H)^{n-1-m} \left[ v_i^{t+1, k+m} \left( s^{t+1}, \left( d_i^{t, k+m}, d_i^{t, k+m} \right) \right) \right. \\
& \quad \left. - v_i^{t+1, k+m+1} \left( s^{t+1}, \left( d_i^{t, k+m+1}, d_i^{t, k+m+1} \right) \right) \right] \\
& + \sum_{m=0}^{n-1} \binom{n}{m} q_H^m (1-q_H)^{n-1-m} \left[ v_i^{t+1, k+m+1} \left( s^{t+1}, \left( d_i^{t, k+m+1}, d_i^{t, k+m+1} \right) \right) \right. \\
& \quad \left. - v_i^{t+1, k+n} \left( s^{t+1}, \left( d_i^{t, k+n}, d_i^{t, k+n} \right) \right) \right]
\end{aligned} \tag{A.17}$$

If condition 3 holds then both addends are positive. Therefore, (A.14) implies (A.16), but it is possible that (A.16) would hold and (A.14) would not. Meaning, if  $d_i^{t, k} = \tilde{B}N, \forall i \in \{1, \dots, n\}$  is a stage-equilibrium then it is necessarily a stage-social-optimum as well; however, it is possible that  $d_i^{t, k} = \tilde{B}N, \forall i \in \{1, \dots, n\}$  is a stage-social-optimum, but (each) player  $i$  has an incentive to unilaterally deviate to  $d_i^{t, k} = \tilde{B}$ .

Similarly, it can be shown that if  $d_i^{t, k} = \tilde{N}, \forall i \in \{1, \dots, n\}$  is a stage-equilibrium then it is necessarily a stage-social-optimum as well; however, it is possible that  $d_i^{t, k} = \tilde{N}, \forall i \in \{1, \dots, n\}$  is a stage-social-optimum, but (each) player  $i$  has an incentive to unilaterally deviate to  $d_i^{t, k} = \tilde{B}$ .  $\square$

## SM.4

**Claim 1.** *In MPE and in the socially optimal policy,*

$$d_i^{T, k} = \tilde{B}, \forall k \in \{0, 1, \dots, nT\}, \forall i \in \{1, \dots, n\}$$

*Proof.* In period  $T$ , the expected payoff of player  $i$  in E-state  $T, k$  is:

$$v_i^{T, k} \left( d_i^{T, k}, d_{-i}^{T, k} \right) = \sum_{j \in \{L, H\}} \left[ P \left( B \mid j, d_i^{T, k} \right) q_j p_j e_B^{T, k} + P \left( N \mid j, d_i^{T, k} \right) q_j p_j e_N^{T, k} \right] \tag{A.18}$$

i.e.

$$\begin{aligned}
v_i^{T, k} \left( \tilde{B}, d_{-i}^{T, k} \right) &= e_B^{T, k} [q_H p_H + (1 - q_H) p_L] \\
v_i^{T, k} \left( \tilde{B}N, d_{-i}^{T, k} \right) &= e_B^{T, k} q_H p_H + e_N^{T, k} (1 - q_H) p_L \\
v_i^{T, k} \left( \tilde{N}, d_{-i}^{T, k} \right) &= e_N^{T, k} [q_H p_H + (1 - q_H) p_L]
\end{aligned} \tag{A.19}$$

And because (4)

$$e_B^{T, k} > e_N^{T, k} \forall k \in \{0, 1, \dots, nT\} \tag{A.20}$$

we get that

$$v_i^{T,k} \left( \tilde{B}, d_{-i}^{T,k} \right) > v_i^{T,k} \left( \tilde{B}\tilde{N}, d_{-i}^{T,k} \right) > v_i^{T,k} \left( \tilde{N}, d_{-i}^{T,k} \right) \quad (\text{A.21})$$

□

## SM.5

**Claim 2.** In a fixed symmetric strategy profile where  $d_i^{t,k} = \tilde{B}\tilde{N}, \forall i \in \{1, \dots, n\}, \forall k \in \{0, 1, \dots, n(T-1)\}, t = 0, \dots, T-1$  and  $d_i^{T,k} = \tilde{B}, \forall i \in \{1, \dots, n\}, \forall k \in \{0, 1, \dots, nT\}$

$$\begin{aligned} & v_i^{t,k} \left( s^{t+1}, \left( d_i^{t,k}, d_i^{t,k} \right) \right) - v_i^{t,k+1} \left( s^{t+1}, \left( d_i^{t,k+1}, d_i^{t,k+1} \right) \right) \\ &= (T-t) [\alpha_B q_H p_H - I \alpha_N (1-q_H) p_L] + \alpha_B [q_H p_H + (1-q_H) p_L] \end{aligned} \quad (\text{A.22})$$

*Proof.* By induction.

(A.22) holds for  $t = T$ :

By claim 1, in period  $T$ , the expected payoff of player  $i$  in E-state  $T, k$  is:

$$v_i^{T,k} \left( \tilde{B}, \tilde{B} \right) = e_B^{T,k} [q_H p_H + (1-q_H) p_L] \quad (\text{A.23})$$

Therefore for  $t = T$ ,

$$\begin{aligned} & v_i^{t,k} \left( s^{t+1}, \left( d_i^{t,k}, d_i^{t,k} \right) \right) - v_i^{t,k+1} \left( s^{t+1}, \left( d_i^{t,k+1}, d_i^{t,k+1} \right) \right) \\ &= v_i^{T,k} \left( \tilde{B}, \tilde{B} \right) - v_i^{T,k+1} \left( \tilde{B}, \tilde{B} \right) \\ &= e_B^{T,k} [q_H p_H + (1-q_H) p_L] - e_B^{T,k+1} [q_H p_H + (1-q_H) p_L] \\ &= \alpha_B [q_H p_H + (1-q_H) p_L] \\ &= (T-T) [\alpha_B q_H p_H - I \alpha_N (1-q_H) p_L] + \alpha_B [q_H p_H + (1-q_H) p_L] \end{aligned} \quad (\text{A.24})$$

Assume that (A.22) holds for some  $t+1$ ; then for a fixed symmetric strategy profile where  $d_i^{t,k} = \tilde{B}\tilde{N}, \forall k \in \{0, 1, \dots, nt\}, \forall i \in \{1, \dots, n\}$  it holds for  $t$  as well:



$$\begin{aligned}
& v_i^{t,k} \left( s^{t+1}, \left( \tilde{B}N, \tilde{B}N \right) \right) - v_i^{t,k+1} \left( s^{t+1}, \left( \tilde{B}N, \tilde{B}N \right) \right) \\
&= \left( \left[ e_B^{t,k} q_H p_H + e_N^{t,k} (1 - q_H) p_L \right] \right. \\
&+ \sum_{m=0}^n \binom{n}{m} q_H^m (1 - q_H)^{n-m} v_i^{t+1,k+m} \left( s^{t+1}, \left( d_i^{t,k+m}, d_i^{t,k+m} \right) \right) \\
&- \left( \left[ e_B^{t,k+1} q_H p_H + e_N^{t,k+1} (1 - q_H) p_L \right] \right. \\
&+ \sum_{m=0}^n \binom{n}{m} q_H^m (1 - q_H)^{n-m} v_i^{t+1,k+m+1} \left( s^{t+1}, \left( d_i^{t,k+m+1}, d_i^{t,k+m+1} \right) \right) \\
&= \alpha_B q_H p_H - I \alpha_N (1 - q_H) p_L \\
&+ \sum_{m=0}^n \binom{n}{m} q_H^m (1 - q_H)^{n-m} \left[ v_i^{t+1,k+m} \left( s^{t+2}, \left( d_i^{t+1,k+m}, d_i^{t+1,k+m} \right) \right) \right. \\
&- \left. v_i^{t+1,k+m+1} \left( s^{t+2}, \left( d_i^{t+1,k+m+1}, d_i^{t+1,k+m+1} \right) \right) \right] \\
&= \alpha_B q_H p_H - I \alpha_N (1 - q_H) p_L \\
&+ \sum_{m=0}^n \binom{n}{m} q_H^m (1 - q_H)^{n-m} \left[ (T - (t + 1)) [\alpha_B q_H p_H - \alpha_N (1 - q_H) p_L] \right. \\
&+ \left. \alpha_B [q_H p_H + (1 - q_H) p_L] \right] \\
&= \alpha_B q_H p_H - I \alpha_N (1 - q_H) p_L \\
&+ [(T - t - 1) [\alpha_B q_H p_H - I \alpha_N (1 - q_H) p_L] + \alpha_B [q_H p_H + (1 - q_H) p_L]] \\
&= (T - t) [\alpha_B q_H p_H - I \alpha_N (1 - q_H) p_L] + \alpha_B [q_H p_H + (1 - q_H) p_L]
\end{aligned} \tag{A.25}$$

□

## SM.6

**Lemma 3.** *The fixed symmetric strategy profile where  $d_i^{t,k} = \tilde{B}N, \forall k \in \{0, 1, \dots, nt\}, \forall i \in \{1, \dots, n\}, t = 0, \dots, T - 1$  and  $d_i^{T,k} = \tilde{B}, \forall k \in \{0, 1, \dots, nT\}, \forall i \in \{1, \dots, n\}$  is a MPE if*

$$\begin{aligned}
& \left( e_B^{t,k} - e_N^{t,k} \right) p_L \\
& \leq [T - (t + 1)] [\alpha_B q_H p_H - I \alpha_N (1 - q_H) p_L] + \alpha_B [q_H p_H + (1 - q_H) p_L] \\
& \leq \left( e_B^{t,k} - e_N^{t,k} \right) p_H
\end{aligned}$$

*Proof.* By the ‘‘One-Stage Deviation Principle’’, it is sufficient to verify that player  $i$  cannot gain by deviating from  $s$  in a single E-state.

(i) By lemma 1, in E-state  $t, k$  player  $i$  has no incentive to deviate to  $d_i^{t,k} = \tilde{N}$  if

$$\begin{aligned}
& \left( e_B^{t,k} - e_N^{t,k} \right) p_H \\
& \geq \sum_{m=0}^{n-1} \binom{n-1}{m} q_H^m (1 - q_H)^{n-1-m} \left[ v_i^{t+1,k+m} \left( s^{t+1}, \left( d_i^{t,k+m}, d_i^{t,k+m} \right) \right) \right. \\
& - \left. v_i^{t+1,k+m+1} \left( s^{t+1}, \left( d_i^{t,k+m+1}, d_i^{t,k+m+1} \right) \right) \right]
\end{aligned} \tag{A.26}$$

By claim 2:

$$\begin{aligned}
& \sum_{m=0}^{n-1} \binom{n-1}{m} q_H^m (1-q_H)^{n-1-m} \left[ v_i^{t+1, k+m} \left( s^{t+1}, \left( d_i^{t, k+m}, d_i^{t, k+m} \right) \right) \right. \\
& \quad \left. - v_i^{t+1, k+m+1} \left( s^{t+1}, \left( d_i^{t, k+m+1}, d_i^{t, k+m+1} \right) \right) \right] \\
& = (T - (t+1)) [\alpha_B q_H p_H - I \alpha_N (1-q_H) p_L] + \alpha_B [q_H p_H + (1-q_H) p_L]
\end{aligned} \tag{A.27}$$

which yields

$$\begin{aligned}
& \left( e_B^{t, k} - e_N^{t, k} \right) p_H \\
& \geq (T - (t+1)) [\alpha_B q_H p_H - I \alpha_N (1-q_H) p_L] + \alpha_B [q_H p_H + (1-q_H) p_L]
\end{aligned} \tag{A.28}$$

(ii) By lemma 1, in E-state  $t, k$ , Player  $i$  has no incentive to deviate to  $d_i^{t, k} = \tilde{B}$  if

$$\begin{aligned}
& \left( e_B^{t, k} - e_N^{t, k} \right) p_L \\
& \leq \sum_{m=0}^{n-1} \binom{n-1}{m} q_H^m (1-q_H)^{n-1-m} \left[ v_i^{t+1, k+m} \left( s^{t+1}, \left( d_i^{t, k+m}, d_i^{t, k+m} \right) \right) \right. \\
& \quad \left. - v_i^{t+1, k+m+1} \left( s^{t+1}, \left( d_i^{t, k+m+1}, d_i^{t, k+m+1} \right) \right) \right]
\end{aligned} \tag{A.29}$$

And by claim 2:

$$\begin{aligned}
& \left( e_B^{t, k} - e_N^{t, k} \right) p_L \\
& \leq (T - (t+1)) [\alpha_B q_H p_H - I \alpha_N (1-q_H) p_L] + \alpha_B [q_H p_H + (1-q_H) p_L]
\end{aligned} \tag{A.30}$$

□

## SM.7

**Lemma 4.** *The fixed symmetric strategy profile where  $d^{t, k} = \tilde{B} \tilde{N}, \forall k \in \{0, 1, \dots, nt\}, t = 0, \dots, T-1$  and  $d^{T, k} = \tilde{B}, \forall k \in \{0, 1, \dots, nT\}$  is an optimal policy if*

$$\begin{aligned}
& \left( e_B^{t, k} - e_N^{t, k} \right) p_L \\
& \leq n \left( [T - (t+1)] [\alpha_B q_H p_H - I \alpha_N (1-q_H) p_L] + \alpha_B [q_H p_H + (1-q_H) p_L] \right) \\
& \leq \left( e_B^{t, k} - e_N^{t, k} \right) p_H
\end{aligned}$$

*Proof.* (i) By lemma 2, in E-state  $t, k$  the social planner has no incentive to deviate to  $d^{t, k} = \tilde{N}$  if

$$\begin{aligned}
& \left( e_B^{t, k} - e_N^{t, k} \right) q_H p_H \\
& \geq \sum_{m=0}^n \binom{n}{m} q_H^m (1-q_H)^{n-m} \left[ v_i^{t+1, k} \left( s^{t+1}, \left( d_i^{t, k}, d_i^{t, k} \right) \right) \right. \\
& \quad \left. - v_i^{t+1, k+m} \left( s^{t+1}, \left( d_i^{t, k+m}, d_i^{t, k+m} \right) \right) \right]
\end{aligned} \tag{A.31}$$

$$\text{Let } \delta v_i^{t+1,k} = v_i^{t+1,k} \left( s^{t+1}, \left( d_i^{t,k}, d_i^{t,k} \right) \right) - v_i^{t+1,k+1} \left( s^{t+1}, \left( d_i^{t,k+1}, d_i^{t,k+1} \right) \right).$$

$$\begin{aligned} & \sum_{m=0}^n \binom{n}{m} q_H^m (1 - q_H)^{n-m} \left[ v_i^{t+1,k} \left( s^{t+1}, \left( d_i^{t,k}, d_i^{t,k} \right) \right) \right. \\ & \quad \left. - v_i^{t+1,k+m} \left( s^{t+1}, \left( d_i^{t,k+m}, d_i^{t,k+m} \right) \right) \right] \\ &= \sum_{m=0}^n \binom{n}{m} q_H^m (1 - q_H)^{n-m} m \delta v_i^{t+1,k} \\ &= \delta v_i^{t+1,k} \left( \sum_{m=0}^n \binom{n}{m} q_H^m (1 - q_H)^{n-m} m \right) \\ &= \delta v_i^{t+1,k} \cdot n q_H \end{aligned}$$

Therefore, (A.31) and claim 2 implies

$$\begin{aligned} & \left( e_B^{t,k} - e_N^{t,k} \right) p_H \geq n \delta v_i^{t+1,k} \\ &= n \left[ v_i^{t+1,k} \left( s^{t+1}, \left( d_i^{t,k}, d_i^{t,k} \right) \right) \right. \\ & \quad \left. - v_i^{t+1,k+1} \left( s^{t+1}, \left( d_i^{t,k+1}, d_i^{t,k+1} \right) \right) \right] \tag{A.32} \\ &= n \left[ (T - (t + 1)) [\alpha_B q_H p_H - I \alpha_N (1 - q_H) p_L] + \alpha_B [q_H p_H + (1 - q_H) p_L] \right] \end{aligned}$$

(ii) By lemma 2, in E-state  $t, k$  the social planner has no incentive to deviate to  $d^{t,k} = \tilde{B}$  if

$$\begin{aligned} & \left( e_B^{t,k} - e_N^{t,k} \right) (1 - q_H) p_L \\ & \leq \sum_{m=0}^n \binom{n}{m} q_H^m (1 - q_H)^{n-m} \left[ v_i^{t+1,k+m} \left( s^{t+1}, \left( d_i^{t,k+m}, d_i^{t,k+m} \right) \right) \right. \\ & \quad \left. - v_i^{t+1,k+n} \left( s^{t+1}, \left( d_i^{t,k+n}, d_i^{t,k+n} \right) \right) \right] \tag{A.33} \end{aligned}$$

$$\text{Using } \delta v_i^{t+1,k} = v_i^{t+1,k} \left( s^{t+1}, \left( d_i^{t,k}, d_i^{t,k} \right) \right) - v_i^{t+1,k+1} \left( s^{t+1}, \left( d_i^{t,k+1}, d_i^{t,k+1} \right) \right).$$

$$\begin{aligned} & \sum_{m=0}^n \binom{n}{m} q_H^m (1 - q_H)^{n-m} \left[ v_i^{t+1,k+m} \left( s^{t+1}, \left( d_i^{t,k+m}, d_i^{t,k+m} \right) \right) \right. \\ & \quad \left. - v_i^{t+1,k+n} \left( s^{t+1}, \left( d_i^{t,k+n}, d_i^{t,k+n} \right) \right) \right] \\ &= \sum_{m=0}^n \binom{n}{m} q_H^m (1 - q_H)^{n-m} (n - m) \delta v_i^{t+1,k} \\ &= \delta v_i^{t+1,k} \left( n - \sum_{m=0}^n \binom{n}{m} q_H^m (1 - q_H)^{n-m} m \right) \\ &= \delta v_i^{t+1,k} (n - n q_H) \\ &= n (1 - q_H) \delta v_i^{t+1,k} \end{aligned}$$

Therefore, (A.33) implies

$$\begin{aligned}
\left(e_B^{t,k} - e_N^{t,k}\right) p_L &\leq n\delta v_i^{t+1,k} \\
&= n \left[ v_i^{t+1,k} \left( s^{t+1}, \left( d_i^{t,k}, d_i^{t,k} \right) \right) \right. \\
&\quad \left. - v_i^{t+1,k+1} \left( s^{t+1}, \left( d_i^{t,k+1}, d_i^{t,k+1} \right) \right) \right] \\
&= n \left[ (T - (t + 1)) [\alpha_B q_H p_H - I \alpha_N (1 - q_H) p_L] + \alpha_B [q_H p_H + (1 - q_H) p_L] \right]
\end{aligned} \tag{A.34}$$

□

## SM.8

**Theorem 2.** *If condition 3 holds, then if the fixed symmetric strategy profile where  $d_i^{t,k} = \tilde{B}N, \forall k \in \{0, 1, \dots, nt\}, \forall i \in \{1, \dots, n\}, t = 0, \dots, T - 1$  and  $d_i^{T,k} = \tilde{B}, \forall k \in \{0, 1, \dots, nT\}, \forall i \in \{1, \dots, n\}$  (“the signal-based policy”) is socially optimal, individual player may have an incentive to deviate towards an excessive use of B. Furthermore, if this strategy profile is not optimal for a given combination of medical parameters  $(e_B, e_N, \alpha_B, \alpha_N, q_H, p_H, p_L, I)$  when  $n = 1$ , it may be optimal as the number of patients grows, but will never be an MPE.*

*Proof.* By lemma 3 the fixed symmetric strategy profile where  $d_i^{t,k} = \tilde{B}N, \forall k \in \{0, 1, \dots, nt\}, \forall i \in \{1, \dots, n\}, t = 0, \dots, T - 1$  and  $d_i^{T,k} = \tilde{B}, \forall k \in \{0, 1, \dots, nT\}, \forall i \in \{1, \dots, n\}$  is a MPE if

$$\begin{aligned}
&\left(e_B^{t,k} - e_N^{t,k}\right) p_L \\
&\leq [T - (t + 1)] [\alpha_B q_H p_H - I \alpha_N (1 - q_H) p_L] + \alpha_B [q_H p_H + (1 - q_H) p_L] \\
&\leq \left(e_B^{t,k} - e_N^{t,k}\right) p_H
\end{aligned}$$

And by lemma 4 the fixed symmetric strategy profile where  $d^{t,k} = \tilde{B}N, \forall k \in \{0, 1, \dots, nt\}, t = 0, \dots, T - 1$  and  $d^{T,k} = \tilde{B}, \forall k \in \{0, 1, \dots, nT\}$  is an optimal policy if

$$\begin{aligned}
&\left(e_B^{t,k} - e_N^{t,k}\right) p_L \\
&\leq n \left( [T - (t + 1)] [\alpha_B q_H p_H - I \alpha_N (1 - q_H) p_L] + \alpha_B [q_H p_H + (1 - q_H) p_L] \right) \\
&\leq \left(e_B^{t,k} - e_N^{t,k}\right) p_H
\end{aligned}$$

And if condition 3 holds then

$$\begin{aligned}
&n \left( [T - (t + 1)] [\alpha_B q_H p_H - I \alpha_N (1 - q_H) p_L] + \alpha_B [q_H p_H + (1 - q_H) p_L] \right) \\
&\geq [T - (t + 1)] [\alpha_B q_H p_H - I \alpha_N (1 - q_H) p_L] + \alpha_B [q_H p_H + (1 - q_H) p_L]
\end{aligned}$$

□
